# Supplementary material for: Catalase activity deficiency sensitizes multidrug-resistant Mycobacterium tuberculosis to the ATP synthase inhibitor bedaquiline
Source: PubMed Central journal article supplement (PMC11561320; doi:10.1038/s41467-024-53933-8), 2024-11-13
Supplement: 41467_2024_53933_MOESM1_ESM.pdf [file 41467_2024_53933_MOESM1_ESM.pdf]

## Catalase activity deficiency sensitizes multidrug-resistant *Mycobacterium tuberculosis* to the ATP synthase inhibitor bedaquiline

Ofori-Anyinam B, Hamblin M, Coldren ML, Li B, Mereddy G, Shaikh M, Shah A, Grady C, Ranu N, Lu S, Blainey PC, Ma S, Collins JJ, Yang JH

### SUPPLEMENTARY TABLES

| <i>M. tuberculosis</i> Strain | Genotype                                          | Resistance       | Reference (PMID)      | Source                                                      |
|-------------------------------|---------------------------------------------------|------------------|-----------------------|-------------------------------------------------------------|
| H37Rv                         | Wild-type H37Rv                                   | ---              | ATCC #27294           | Deborah Hung (Broad Institute)<br>William Jacobs (Einstein) |
| H37Rv $\Delta katG$           | H37Rv $\Delta katG$                               | INH <sup>R</sup> | 32631825              | William Jacobs (Einstein)                                   |
| H37Rv $\Delta katG$ pEmpty    | H37Rv $\Delta katG$ pMSG430                       | INH <sup>R</sup> | ---                   | Christina Stallings (WUSTL)                                 |
| H37Rv $\Delta katG$           | H37Rv $\Delta katG$ pMSG430-<br><i>katG</i>       | ---              | ---                   | Christina Stallings (WUSTL)                                 |
| H37Rv pEmpty                  | H37Rv pEXCF                                       | ---              | 23823726,<br>25380655 | David Sherman (U Washington)                                |
| H37Rv <i>pfurA</i>            | H37Rv pEXCF-Rv1909c                               | INH <sup>R</sup> | 23823726,<br>25380655 | David Sherman (U Washington)                                |
| mc <sup>2</sup> 7902          | H37Rv $\Delta panCD \Delta leuCD \Delta argB$     | ---              | 29844114              | William Jacobs (Einstein)                                   |
| mc <sup>2</sup> 8245          | mc <sup>2</sup> 7902 $\Delta 2116169-2162530$     | INH <sup>R</sup> | 29844114              | William Jacobs (Einstein)                                   |
| H37Rv pRv3160c                | H37Rv pEXCF-Rv3160c                               | ---              | 23823726,<br>25380655 | David Sherman (U Washington)                                |
| H37Rv <i>pkmtR</i>            | wild-type <i>katG</i> , <i>inhA</i> , <i>rpoB</i> | ---              | 23823726,<br>25380655 | David Sherman (U Washington)                                |
| H37Rv <i>pprpR</i>            | H37Rv pEXCF-Rv1129c                               | ---              | 23823726,<br>25380655 | David Sherman (U Washington)                                |
| TDR-TB-0019                   | KatG S315T, RpoB L533P                            | INH <sup>R</sup> | 22236841              | David Alland (Rutgers)                                      |
| TDR-TB-0077                   | wild-type <i>katG</i> , <i>inhA</i> , <i>rpoB</i> | ---              | 22236841              | David Alland (Rutgers)                                      |
| TDR-TB-0081                   | wild-type <i>katG</i> , <i>inhA</i> , <i>rpoB</i> | ---              | 22236841              | David Alland (Rutgers)                                      |
| TDR-TB-0091                   | wild-type <i>katG</i> , <i>inhA</i> , <i>rpoB</i> | ---              | 22236841              | David Alland (Rutgers)                                      |
| TDR-TB-0126                   | wild-type <i>katG</i> , <i>inhA</i> , <i>rpoB</i> | ---              | 22236841              | David Alland (Rutgers)                                      |
| TDR-TB-0163                   | wild-type <i>katG</i> , <i>inhA</i> , <i>rpoB</i> | ---              | 22236841              | David Alland (Rutgers)                                      |
| TDR-TB-0031                   | KatG S315T, RpoB S531W                            | INH <sup>R</sup> | 22236841              | David Alland (Rutgers)                                      |
| TDR-TB-0042                   | KatG S315T                                        | INH <sup>R</sup> | 22236841              | David Alland (Rutgers)                                      |
| TDR-TB-0193                   | <i>inhA</i> C -15 T, RpoB S531L                   | INH <sup>R</sup> | 22236841              | David Alland (Rutgers)                                      |
| TDR-TB-0198                   | KatG S315T, RpoB D516V                            | INH <sup>R</sup> | 22236841              | David Alland (Rutgers)                                      |

Supplementary Table 1. List of strains used in this study.

| Strain | INH MIC | RIF MIC | <i>katG</i> nucleotide variant | <i>katG</i> amino acid variant | <i>inhA</i> nucleotide variant | <i>rpoB</i> nucleotide variant | <i>rpoB</i> amino acid variant | Lineage | Geographical Origin |
|--------|---------|---------|--------------------------------|--------------------------------|--------------------------------|--------------------------------|--------------------------------|---------|---------------------|
|--------|---------|---------|--------------------------------|--------------------------------|--------------------------------|--------------------------------|--------------------------------|---------|---------------------|

| <i>INH-Susceptible</i> |        |     |           |           |           |           |           |           |             |
|------------------------|--------|-----|-----------|-----------|-----------|-----------|-----------|-----------|-------------|
| TDR-TB-0077            | 0.2    | 30  | wild type | wild type | wild type | wild type | wild type | 2/Beijing | South Korea |
| TDR-TB-0081            | 0.2    | ≤10 | wild type | wild type | wild type | wild type | wild type | 2/Beijing | South Korea |
| TDR-TB-0126            | 0.2    | ≤10 | wild type | wild type | wild type | wild type | wild type | 4/LAM     | Brazil      |
| TDR-TB-0163            | ≤ 0.05 | ≤10 | wild type | wild type | wild type | wild type | wild type | 4/Haarlem | Peru        |

| <i>INH-Resistant</i> |       |       |                      |             |           |                      |             |                          |            |
|----------------------|-------|-------|----------------------|-------------|-----------|----------------------|-------------|--------------------------|------------|
| TDR-TB-0019          | 3.2   | 120   | AGC 315<br>ACC       | Ser 315 Thr | wild type | CTG 533<br>CCG       | Leu 533 Pro |                          | Azerbaijan |
| TDR-TB-0031          | > 3.2 | > 120 | AGC 315<br>ACC       | Ser 315 Thr | wild type | TCG 531<br>TGG       | Ser 531 Trp |                          | Kazakhstan |
| TDR-TB-0042          | > 3.2 | ≤ 10  | AGC 315<br>ACC       | Ser 315 Thr | wild type | wild type<br>TCG 531 | wild type   | 1/East African<br>Indian | Bangladesh |
| TDR-TB-0193          | > 3.2 | > 120 | wild type<br>AGC 315 | wild type   | C -15 T   | TTG<br>GAC 516       | Ser 531 Leu | 4/LAM                    | Portugal   |
| TDR-TB-0198          | 3.2   | > 120 | ACC                  | Ser 315 Thr | wild type | GTC                  | Asp 516 Val | 4/LAM                    | Peru       |

**Supplementary Table 2. Information on isoniazid-resistant and isoniazid-susceptible TDR-TB strains used in this study.**

## SUPPLEMENTARY FIGURES

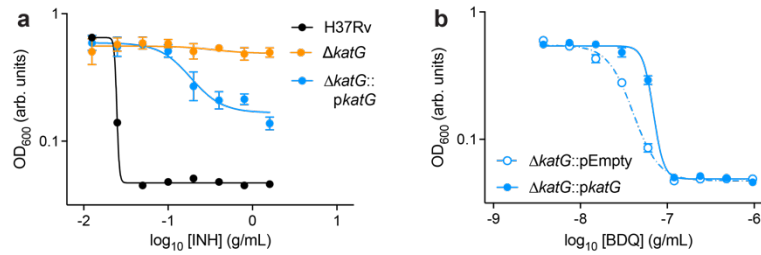

**Supplementary Fig. 1. Catalase activity deficiency sensitizes drug-resistant *Mycobacterium tuberculosis* to bedaquiline.** **a**,  $\Delta katG$  cells are resistant to INH relative to wild-type cells in 8-day growth inhibition dose-response experiments. *katG* complementation by transformation with pMSG430-*katG* partially restores INH susceptibility in  $\Delta katG$  cells. **b**, *katG* complementation in  $\Delta katG$  cells decreases BDQ sensitivity relative to empty vector  $\Delta katG$  control cells in 8-day growth inhibition dose-response experiments.  $n = 3$  biological replicates for all experiments. Data depicted as mean  $\pm$  SEM. Source data are provided in the Source Data file.

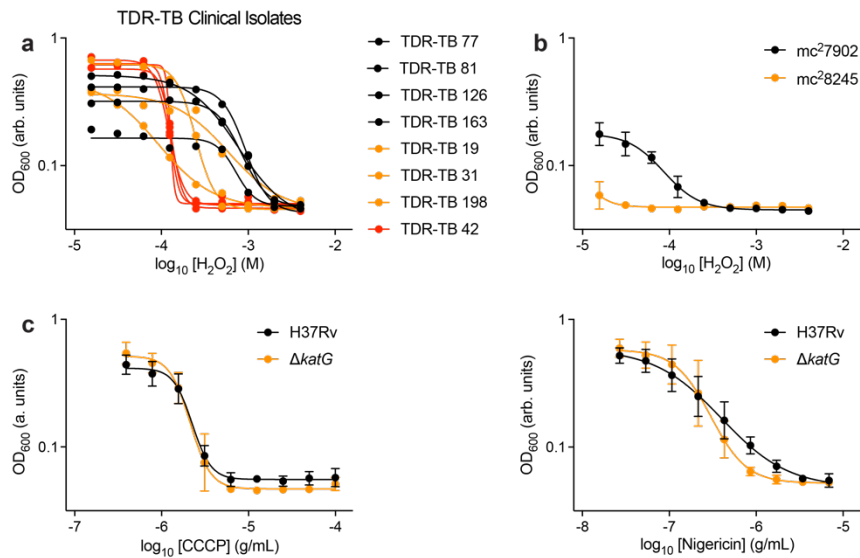

**Supplementary Fig. 2. Catalase activity-deficient cells are sensitized to oxidative stress.** **a**, 8-day H<sub>2</sub>O<sub>2</sub> growth inhibition dose-response experiments for individual TDR-TB clinical strains (Fig. 2b). MDR (orange) and non-MDR INH-resistant (red) clinical strains are hypersensitive to H<sub>2</sub>O<sub>2</sub> relative to INH-susceptible (black) clinical strains. **b**, KatG-deficient mc<sup>2</sup>8245 cells are hypersensitive to H<sub>2</sub>O<sub>2</sub> relative to KatG-replete mc<sup>2</sup>7902 cells in 8-day growth inhibition dose-response experiments. **c**, Δ*katG* cells are not sensitized to carbonyl cyanide m-chlorophenyl hydrazone (CCCP) (left) or to nigericin (right) relative to wild-type cells in 8-day growth inhibition dose-response experiments. n = 4 biological replicates for non-MDR INH-resistant TDR-TB 42 (red). n = 1 biological replicate for all other TDR-TB clinical strains. n = 3 biological replicates for experiments involving wild-type or Δ*katG* H37Rv cells. Data depicted as mean ± SEM. Source data are provided in the Source Data file.

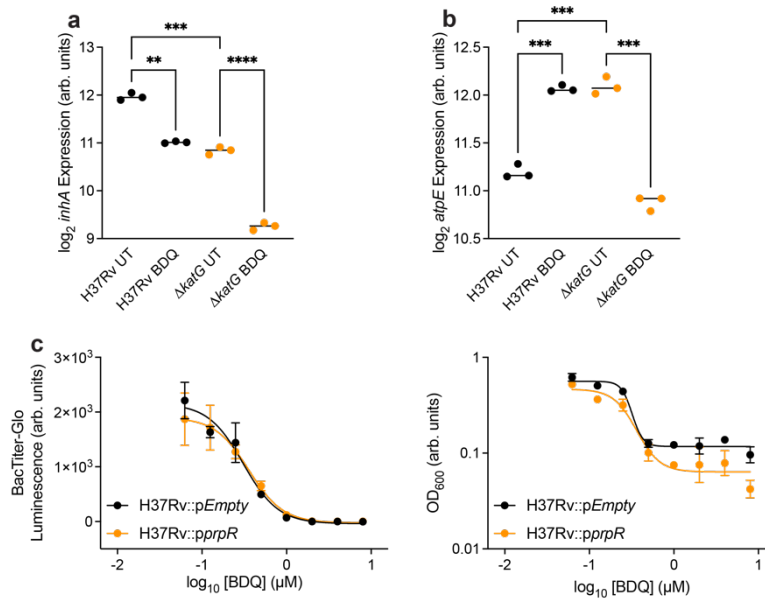

**Supplementary Fig. 3. Transcriptional programs induced by catalase activity deficiency sensitize *Mtb* to bedaquiline.** **a**, BDQ treatment decreases *inhA* expression in wild-type and  $\Delta katG$  cells as measured by RNA sequencing. **b**, BDQ treatment decreases *atpE* expression in  $\Delta katG$  cells as measured by RNA sequencing. Expression data reported as smooth quantile normalized  $\log_2$  sequencing counts. **c**, *prpR* over-expression does not sensitize cells to BDQ-inhibited ATP synthesis or growth in 7-day dose-response experiments as determined by BacTiter-Glo and optical density. Brown-Forsythe and Welch ANOVA tests were performed on RNA expression data with comparisons between BDQ-treated and untreated cells wild-type and  $\Delta katG$  cells or between untreated wild-type and  $\Delta katG$  with Dunnett's T3 multiple comparisons test FDR correction, as indicated.  $n = 3$  biological replicates for all experiments. \*\*:  $p \leq 0.01$ , \*\*\*:  $p \leq 0.001$ , \*\*\*\*:  $p \leq 0.0001$ . Data depicted as mean  $\pm$  SEM. Source data are provided in the Source Data file.

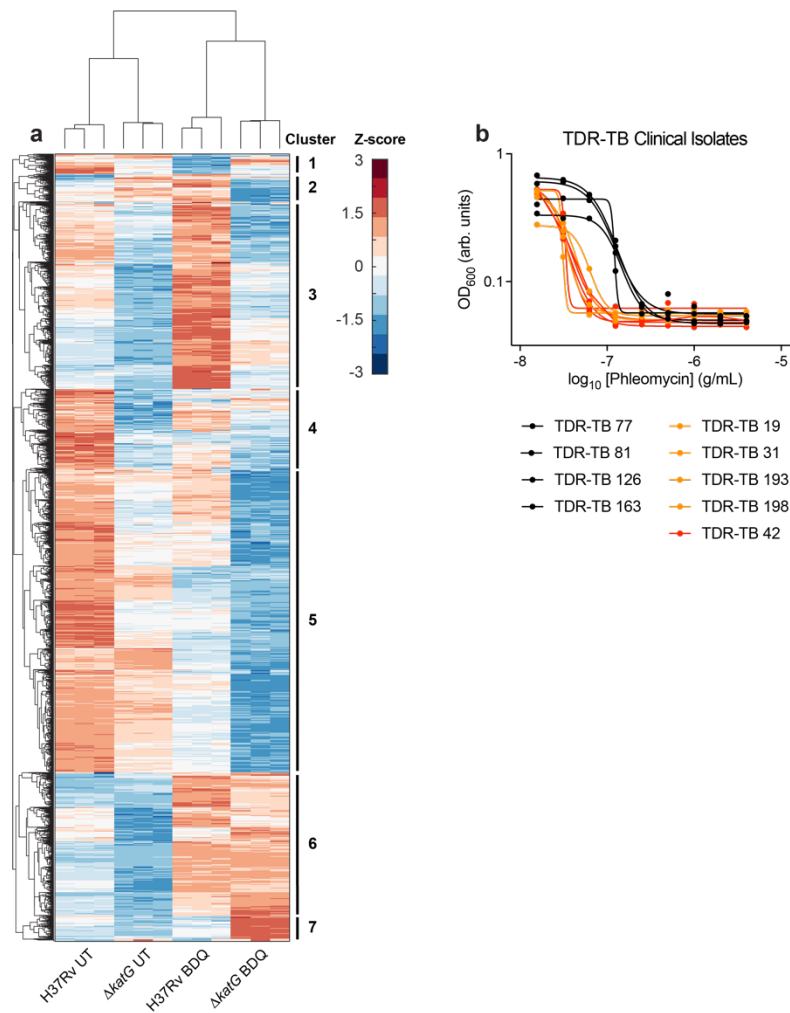

**Supplementary Fig. 4. Catalase activity deficiency sensitizes *Mtb* to DNA damage.** **a**, Smooth quantile normalized RNA sequencing expression data from BDQ-treated and untreated wild-type and  $\Delta katG$  H37Rv cells. Clusters defined by hierarchical clustering, illustrating differences in BDQ-induced expression changes between H37Rv and  $\Delta katG$  cells.  $n = 3$  biological replicates. **b**, 8-day phleomycin growth inhibition dose-response experiments for individual TDR-TB clinical strains (Fig. 4d). MDR (orange) and non-MDR INH-resistant (red) clinical strains are hypersensitive to phleomycin relative to INH-susceptible (black) clinical strains.  $n = 4$  biological replicates for non-MDR INH-resistant TDR-TB 42 (red).  $n = 1$  biological replicate for all other TDR-TB clinical strains. Data depicted as mean  $\pm$  SEM. Source data are provided in the Source Data file.

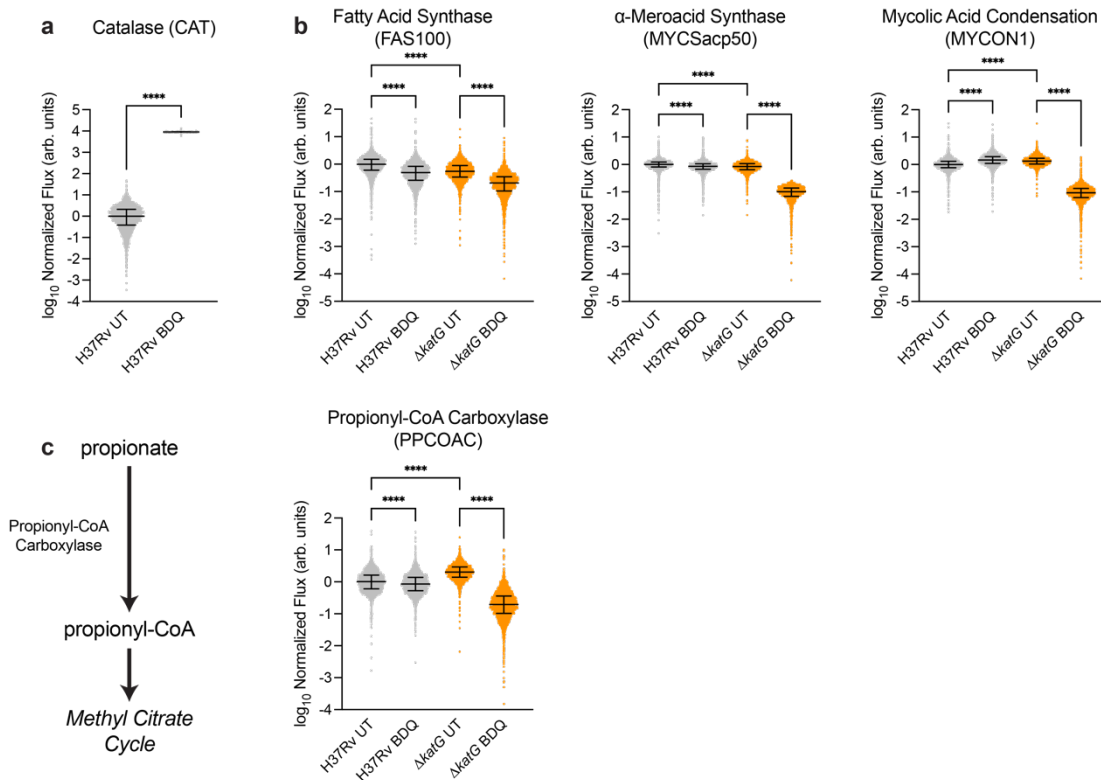

**Supplementary Fig. 5. Bedaquiline grossly alters mycobacterial metabolism in  $\Delta katG$  cells.** **a**, Simulated catalase (CAT reaction) for BDQ-treated and untreated wild-type and  $\Delta katG$  H37Rv cells from the iEK1011 Mtb genome-scale metabolic model. **b**, Simulated fatty acid synthase (FAS100),  $\alpha$ -meroacid synthase (MYCSacp50), and mycolic acid condensation (MYCON1) activities for BDQ-treated and untreated wild-type and  $\Delta katG$  H37Rv cells. BDQ synergistically represses mycolic acid synthesis in  $\Delta katG$  cells. **c**, Simulated propionyl-CoA carboxylase (PPCOAC) activities for BDQ-treated and untreated wild-type and  $\Delta katG$  H37Rv cells. BDQ synergistically represses propionate metabolism in  $\Delta katG$  cells.  $n = 10,000$  flux samples were collected for each metabolic simulation. Two-tailed Mann-Whitney or Kruskal-Wallis test was performed on metabolic modelling simulations with comparisons between untreated wild-type and  $\Delta katG$  cells, BDQ-treated and untreated cells wild-type cells, and BDQ-treated and untreated  $\Delta katG$  cells with Dunn's multiple comparisons test FDR correction, as indicated. \*\*\*\*:  $p \leq 0.0001$ . Data depicted as mean  $\pm$  SEM. Source data are provided in the Source Data file.

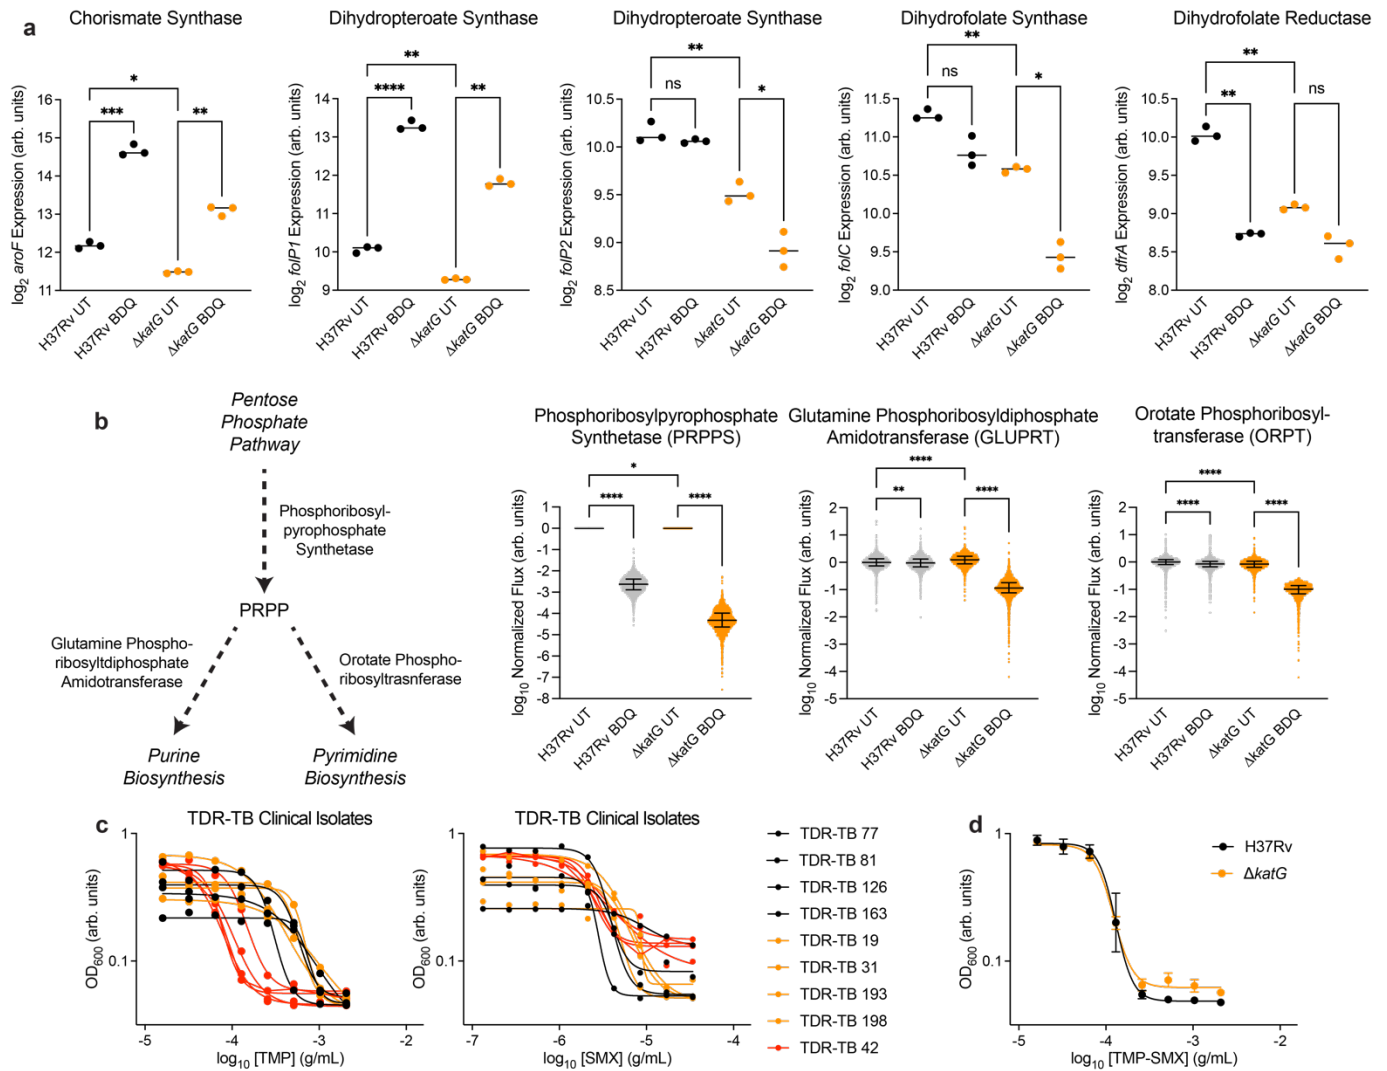

**Supplementary Fig. 6. Catalase activity deficiency sensitizes *Mtb* to inhibition of folate biosynthesis. a**, BDQ treatment increases *aroF* and *folP1* expression and decreases *folP2*, *folC*, and *dfrA* expression in wild-type and  $\Delta katG$  H37Rv cells as measured by RNA sequencing. Expression data reported as smooth quantile normalized  $\log_2$  sequencing counts. **b**, Simulated phosphoribosylpyrophosphate synthase (PRPPS) reaction), glutamine phosphoribosyldiphosphate amidotransferase (GLUPRT), and orotate phosphoribosyltransferase (ORPT) activities for BDQ-treated and untreated wild-type and  $\Delta katG$  H37Rv cells using the iEK1011 *Mtb* genome-scale metabolic model.  $n = 10,000$  flux samples were collected for each metabolic simulation. **c**, 8-day TMP (left) and SMX (right) growth inhibition dose-response experiments for individual TDR-TB clinical strains (Fig. 5b and 5c). A non-MDR INH-resistant (TDR-TB 42) clinical strain is hypersensitive to both TMP and SMX relative to INH-susceptible (black) clinical strains. MDR clinical strains (orange) are not hypersensitive neither TMP nor SMX relative to INH-susceptible strains.  $n = 4$  biological replicates for non-MDR INH-resistant TDR-TB 42 (red).  $n = 1$  biological replicate for all other TDR-TB clinical strains. **d**,  $\Delta katG$  cells are not sensitized to the combination of TMP and SMX relative to wild-type cells in 14-day growth inhibition dose-response experiments.  $n = 3$  biological replicates. Brown-Forsythe and Welch ANOVA tests were performed on RNA expression data with comparisons between BDQ-treated and untreated cells wild-type and  $\Delta katG$  cells or between untreated wild-type and  $\Delta katG$  with Dunnett's T3 multiple comparisons test FDR correction, as indicated. \*:  $p \leq 0.05$ , \*\*:  $p \leq 0.01$ , \*\*\*:  $p \leq 0.001$ , \*\*\*\*:  $p \leq 0.0001$ . Data depicted as mean  $\pm$  SEM. Source data are provided in the Source Data file.
