# Supplementary material for: Catalase activity deficiency sensitizes multidrug-resistant Mycobacterium tuberculosis to the ATP synthase inhibitor bedaquiline
Source: PubMed Central journal article supplement (PMC11561320; doi:10.1038/s41467-024-53933-8), 2024-11-13
Supplement: 41467_2024_53933_MOESM3_ESM.pdf [file 41467_2024_53933_MOESM3_ESM.pdf]

## Description of Additional Supplementary Files

**Supplementary Data 1.** Smooth quantile normalized RNA-sequencing gene expression profiles.

**Supplementary Data 2.** Hierarchically clustered genes from BDQ-treated and untreated wild-type and  $\Delta$ katG H37Rv cells.

**Supplementary Data 3.** iEK1011 metabolic modeling simulations.
